# Supplementary material for: Synthesis of Polymer Assembled Mesoporous CaCO3 Nanoparticles for Molecular Targeting and pH-Responsive Controlled Drug Release
Source: Hindawi journal article supplement (doi:10.1155/2020/8749238), 2020-01-05
Supplement: f1 [file 8749238.f1.docx]

Supporting Information


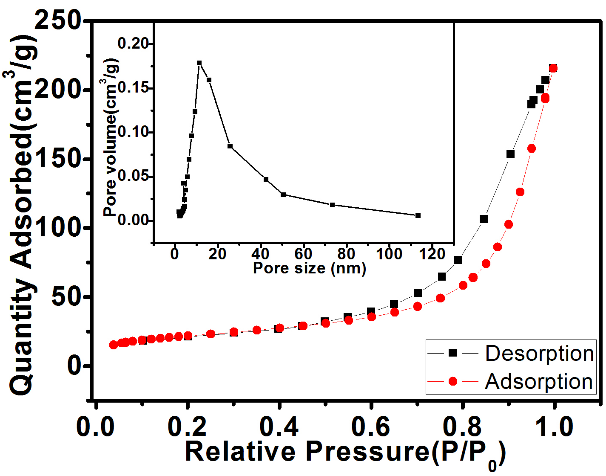


Figure S1. N2 adsorption–desorption isotherms and pore-size distribution of prepared MCNs.


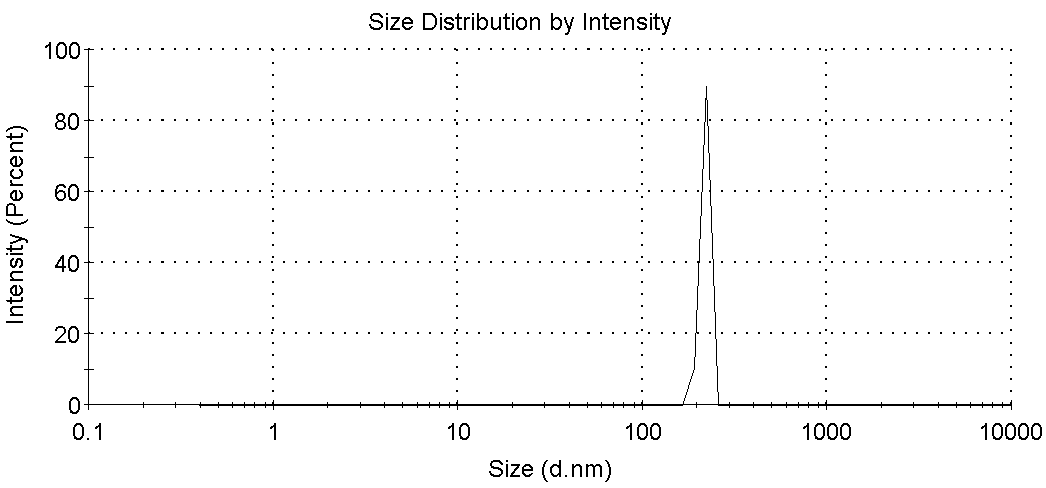


Figure S2. The hydrodynamic diameter of multiple layer coating MCNs in DMEM+10%FBS after 24 h.


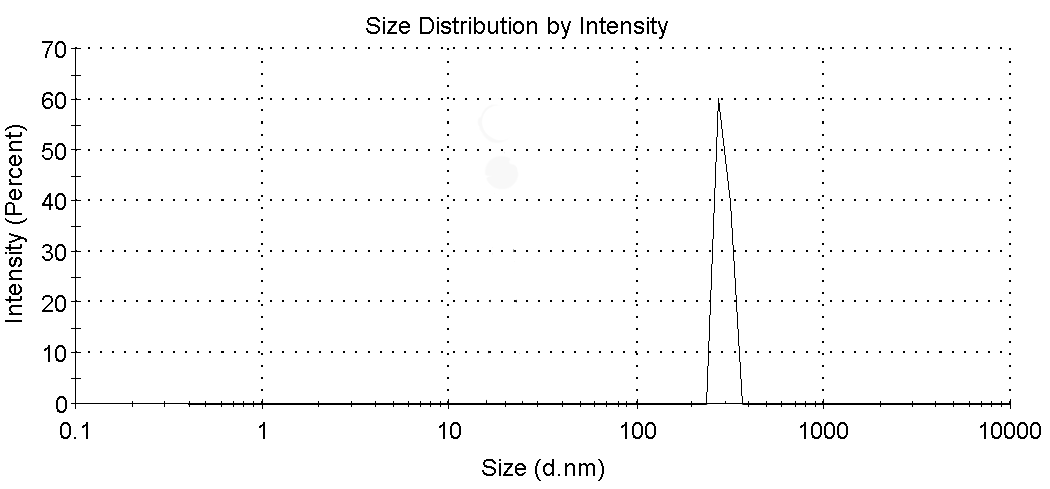


Figure S3.The hydrodynamic diameter of multiple layer coating MCNs in DMEM+10%FBS after 48 h.


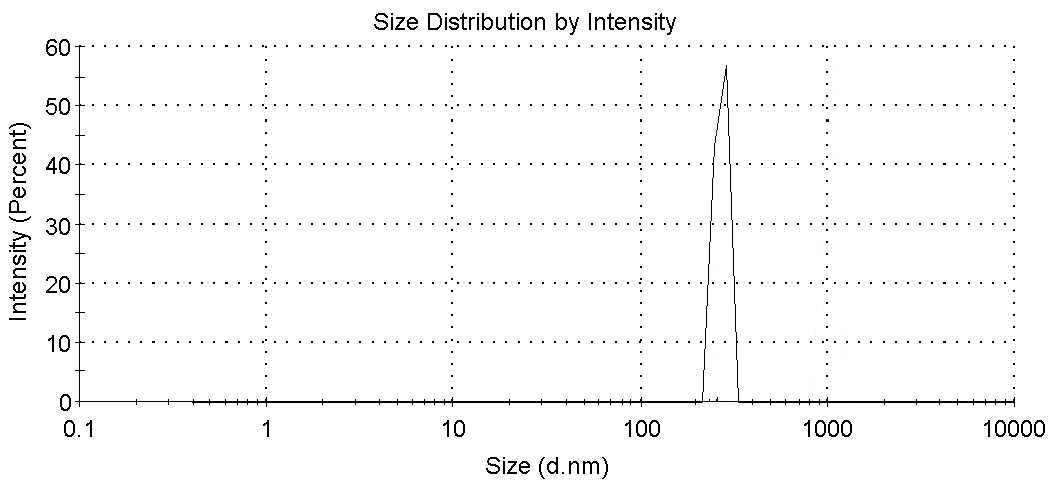


Figure S4. The hydrodynamic diameter of multiple layer coating MCNs in DMEM+10%FBS after 96 h.
